# Supplementary material for: Adaptive Evolution Compensated for the Plasmid Fitness Costs Brought by Specific Genetic Conflicts
Source: MDPI journal article supplement (doi:10.3390/pathogens12010137), 2023-01-13
Supplement: s1 [file s1]

# Adaptive Evolution Compensated the plasmid Fitness Costs brought by specific Genetic Conflicts

Feifeng Li <sup>1†</sup>, Jiong Wang <sup>1†</sup>, Ying Jiang <sup>2</sup>, Yingyi Guo <sup>1</sup>, Ningjing Liu <sup>1</sup>, Shunian Xiao <sup>1</sup>, Likang Yao <sup>1</sup>, Jiahui Li <sup>1</sup>, Chuyue Zhuo <sup>1</sup>, Nanhao He <sup>1</sup>, Baomo Liu <sup>3\*</sup> and Chao Zhuo <sup>1\*</sup>

**Table S4.** Detailed function of non-synonymous SNP-genes in *E. coli* C600 carrying the pHN330 plasmid.

| Gene        | Product and function                                                                                                                              | Supplementary description                                                                                                                                                                                                           |
|-------------|---------------------------------------------------------------------------------------------------------------------------------------------------|-------------------------------------------------------------------------------------------------------------------------------------------------------------------------------------------------------------------------------------|
| <i>ptrA</i> | Protease III; hydrolyzes oligopeptides and peptides; involved in the protein catabolic process of bacteria.                                       | Swamy et al. found that lack of PtrA has no effect on bacterial growth [1].                                                                                                                                                         |
| <i>lpdA</i> | Lipoamide dehydrogenase; component of the pyruvate dehydrogenase complex, which catalyzes the conversion of pyruvate to acetyl-CoA.               | Murarka et al. found that pyruvate dehydrogenase deficient <i>E. coli</i> had decreased growth and glucose metabolism rates [2].                                                                                                    |
| <i>bamA</i> | Outer membrane protein assembly factor BamA; component of the BAM complex, which is essential to constructing and maintaining the outer membrane. | Lack of BamA causes defects in assembly of $\beta$ -barrel protein complex, influencing the construction of the outer membrane [3].                                                                                                 |
| <i>melA</i> | $\alpha$ -Galactosidase; hydrolyzes melibiose to glucose and galactose.                                                                           | Melibiose is a common nutrient. Belyaeva et al. found that mutants in the <i>melA</i> gene affect the growth of bacteria with melibiose as the carbon source [4].                                                                   |
| <i>gatA</i> | Galactitol-specific PTS enzyme IIA component; involved in galactinol phosphorylation and transport.                                               | Galactinol is transported into the cytosol by the PTS system and is a carbon source that provides energy for bacterial growth. Lengeler et al. found that bacteria with a mutated <i>gatA</i> gene cannot transport galactinol [5]. |
| <i>mdoB</i> | Phosphoglycerol transferase I; catalyzes phosphoglycerol residues from phosphatidylglycerol into membrane-derived oligosaccharide.                | Membrane-derived oligosaccharide plays an important role in maintaining the stability of the bacterial membrane [6].                                                                                                                |
| <i>yihV</i> | 6-Deoxy-6-sulfofructose kinase; involved in the sulphoglycolysis pathway.                                                                         | A mutation in the <i>yihV</i> gene influences the utilization of sulfoquinovose in bacteria [7].                                                                                                                                    |
| <i>mntH</i> | Divalent metal cation transporter MntH; transports most metal ions, with high affinity for Mn (II).                                               | Makui et al. found that inactivation of MntH did not affect bacterial growth in nutrient rich medium [8].                                                                                                                           |

|             |                                                                                                                                        |                                                                                                       |
|-------------|----------------------------------------------------------------------------------------------------------------------------------------|-------------------------------------------------------------------------------------------------------|
| <i>trkA</i> | NAD-binding component of Trk potassium transporters; K <sup>+</sup> uptake mediated by Trk transport system with hypotonic conditions. | TrkA plays an important role in maintaining potassium ion homeostasis under hypotonic conditions [9]. |
| <i>ydfK</i> | Cold shock protein; unknown function.                                                                                                  | It has been reported that after a cold shock, the expression of YdfK is upregulated [10].             |

**Table S5.** Detailed functions of non-synonymous SNP-genes in *Escherichia coli* C600N500.

| Gene        | Product and function                                                                                                                                        | Supplementary description                                                                                                                                                                                                                                                                       |
|-------------|-------------------------------------------------------------------------------------------------------------------------------------------------------------|-------------------------------------------------------------------------------------------------------------------------------------------------------------------------------------------------------------------------------------------------------------------------------------------------|
| <i>bamA</i> | Outer membrane protein assembly factor BamA; BamA is a component of the BAM complex, which is essential to constructing and maintaining the outer membrane. | Lack of BamA causes defects in the assembly of the $\beta$ -barrel protein complex, influencing the construction of the outer membrane [3].                                                                                                                                                     |
| <i>bcsG</i> | Cellulose phosphoethanolamine transferase; the BcsE-BcsF-BcsG pathway controls the modification of cellulose by direct protein–protein interactions.        | Exopolysaccharide cellulose is the major component of the self-produced extracellular matrix in biofilms, which enhances antibiotic resistance. The <i>bcsG</i> gene is essential for the formation of cellulose; lack of the <i>bcsG</i> gene results in the inability to form a biofilm [11]. |
| <i>lptF</i> | Lipopolysaccharide transport system protein LptF; involved in lipopolysaccharide transport.                                                                 | Sherman et al. found that LptF is essential for the transport of LPS. LPS plays a vital role in cell mobility, biofilm formation, antibiotic resistance, intestinal colonization, and is responsible for protecting the bacterial cell [12].                                                    |
| <i>mreC</i> | Cell shape determining protein MreC; <i>mreC</i> gene is a component of the <i>mreBCD</i> operon; encodes for cell cytoskeletal proteins.                   | The function of the bacterial cytoskeleton is highly conserved. Kruse T et al. found that the bacterial cell will undergo morphological change then lysis when the MreBCD protein is depleted [13].                                                                                             |
| <i>sfmD</i> | Fimbrial usher protein SfmD                                                                                                                                 | Involved in the functioning of pili—macromolecular structures on the surface of gram-negative bacteria; defects in SfmD will not affect the biofilm formation of <i>E. coli</i> [14].                                                                                                           |

|             |                                                                                                                                                  |                                                                                                                                                                                                                                                                                                                                                   |
|-------------|--------------------------------------------------------------------------------------------------------------------------------------------------|---------------------------------------------------------------------------------------------------------------------------------------------------------------------------------------------------------------------------------------------------------------------------------------------------------------------------------------------------|
| <i>rfaF</i> | ADP-heptose–LPS heptosyltransferase 2; involved in the synthesis of the inner core of LPS.                                                       | The inner core of LPS is highly conserved and responsible for the function of the outer membrane barrier [15].                                                                                                                                                                                                                                    |
| <i>gudD</i> | D-glucarate dehydratase; involved in the D-glucarate catabolic pathway.                                                                          | D-glucarate is not a common product in glucose metabolism [16].                                                                                                                                                                                                                                                                                   |
| <i>araC</i> | DNA-binding transcriptional dual regulator AraC; in the presence of arabinose, AraC stimulates the transcription of arabinose utilization genes. | Generally, bacteria utilize glucose as a carbon source due to carbon catabolite repression [17].                                                                                                                                                                                                                                                  |
| <i>pepQ</i> | Xaa-Pro dipeptidase; PepQ is capable of X-proline dipeptide hydrolysis.                                                                          | Mutants in the <i>pepQ</i> gene of <i>E. coli</i> have no observable change in phenotype [18].                                                                                                                                                                                                                                                    |
| <i>paaJ</i> | Beta-ketoadipyl-CoA thiolase; the <i>paa</i> gene cluster is involved in phenylacetic acid metabolism.                                           | Phenylacetic acid is not a common energy source.                                                                                                                                                                                                                                                                                                  |
| <i>dgt</i>  | Deoxyguanosinetriphosphate triphosphohydrolase; catalytic hydrolysis of dGTP to deoxyguanosine and triphosphate.                                 | dGTPase is involved in maintaining proper dNTP pools and plays a vital role in cell survival and DNA replication. A mutation in the <i>dgt</i> gene reduces the fidelity of DNA replication [19].                                                                                                                                                 |
| <i>mshA</i> | D-inositol 3-phosphate glycosyltransferase; involved in the synthesis of extracellular colanic acid.                                             | Colanic acid, an extracellular polysaccharide secreted by <i>E. coli</i> , is thought to promote biofilm formation and is important for survival. Ren et al. knocked out four consecutive genes of the CA operon ( <i>wza</i> , <i>wzb</i> , <i>wzc</i> , and <i>wcaA</i> ) and found that the strain was unable to synthesize colanic acid [20]. |

**Table S6.** Detailed functions of non-synonymous SNP-genes in *E. coli* C600Y500.

| Gene        | Product and Function                                                                                                                                                                            | Supplementary description                                                                                                                   |
|-------------|-------------------------------------------------------------------------------------------------------------------------------------------------------------------------------------------------|---------------------------------------------------------------------------------------------------------------------------------------------|
| <i>fliY</i> | Cystine ABC transporter periplasmic binding protein; FliY together with the L-cysteine exporter EAMA constitute the L-cysteine/L-cystine shuttle system involved in oxidative stress resistance | Ohtsu et al. found that deletion of the <i>fliY</i> gene results in decreased <i>E. coli</i> growth in LB broth [21].                       |
| <i>bamA</i> | Outer membrane protein assembly factor BamA; BamA is a component of the BAM complex, which is essential to constructing and maintaining the outer membrane.                                     | Lack of BamA causes defects in the assembly of the $\beta$ -barrel protein complex, influencing the construction of the outer membrane [3]. |
| <i>yghQ</i> | Putative transport protein YghQ                                                                                                                                                                 | No study of the <i>yghQ</i> gene has yet been conducted.                                                                                    |

|             |                                                                                                                                     |                                                                                                                                                                                                                                                                               |
|-------------|-------------------------------------------------------------------------------------------------------------------------------------|-------------------------------------------------------------------------------------------------------------------------------------------------------------------------------------------------------------------------------------------------------------------------------|
| <i>caiA</i> | Crotonobetainyl-CoA reductase; Convert crotonobetainyl to $\gamma$ -butyrobetaine under anaerobic conditions.                       | The expression of <i>caiA</i> suppressed is suppressed under aerobic conditions [22].                                                                                                                                                                                         |
| <i>gloA</i> | Glyoxalase I; involved in the glutathione-dependent glyoxalase I pathway that metabolizes methylglyoxal.                            | Endogenous synthesis of methylglyoxal occurs in the glycolytic pathway; 300 $\mu$ M methylglyoxal causes growth arrest and higher concentrations cause cell death. The glutathione-dependent glyoxalase I pathway is the major pathway for methylglyoxal detoxification [23]. |
| <i>acnA</i> | Aconitate hydratase A; catalyzes citrate and isocitrate via cisaconitate in the citric acid and glyoxylate cycles.                  | Mutations in the <i>acnA</i> gene has no effect on the growth of <i>E. coli</i> [24].                                                                                                                                                                                         |
| <i>rlmB</i> | 23S rRNA methyltransferase RlmB; responsible for the methylation of Gm2251 in 23S rRNA                                              | RlmB has no important role in ribosome assembly or function in <i>E. coli</i> [25].                                                                                                                                                                                           |
| <i>ydiF</i> | Acetate-CoA transferase; displays enzymatic activity with short-chain acyl-CoAs.                                                    | Rangarajan et al. found that YdiF is involved in metabolism of short-chain fatty acid [26].                                                                                                                                                                                   |
| <i>sbp</i>  | Sulfate/thiosulfate ABC transporter periplasmic binding protein Sbp; regulates the composition of sulfate–thiosulfate transporters. | Mutants in the <i>sbp</i> gene do not affect thiosulfate and sulfate binding or uptake [27].                                                                                                                                                                                  |
| <i>hycF</i> | Formate hydrogenlyase subunit HycF; enables utilization of formic acid as a source of carbon in <i>E. coli</i> .                    | HycF functions only under anaerobic conditions [28].                                                                                                                                                                                                                          |
| <i>tfaE</i> | Putative tail fiber assembly protein TfaE.                                                                                          | No study of the <i>tfaE</i> gene has yet been conducted.                                                                                                                                                                                                                      |
| <i>ycjX</i> | Putative protein YcjX.                                                                                                              | No study of the <i>ycjX</i> gene has yet been conducted.                                                                                                                                                                                                                      |

## References to the Supplementary Materials

- Swamy, K.H.; Goldberg, A.L. Subcellular distribution of various proteases in Escherichia coli. *J Bacteriol* **1982**, *149*, 1027–1033, doi:10.1128/jb.149.3.1027-1033.1982.
- Murarka, A.; Clomburg, J.M.; Moran, S.; Shanks, J.V.; Gonzalez, R. Metabolic analysis of wild-type Escherichia coli and a pyruvate dehydrogenase complex (PDHC)-deficient derivative reveals the role of PDHC in the fermentative

- metabolism of glucose. *J Biol Chem* **2010**, *285*, 31548–31558, doi:10.1074/jbc.M110.121095.
3. Voulhoux, R.; Bos, M.P.; Geurtsen, J.; Mols, M.; Tommassen, J. Role of a highly conserved bacterial protein in outer membrane protein assembly. *Science* **2003**, *299*, 262–265, doi:10.1126/science.1078973.
  4. Schmitt, R. Analysis of melibiose mutants deficient in alpha-galactosidase and thiomethylgalactoside permease II in Escherichia coli K-12. *J Bacteriol* **1968**, *96*, 462–471, doi:10.1128/jb.96.2.462-471.1968.
  5. Lengeler, J. Mutations affecting transport of the hexitols D-mannitol, D-glucitol, and galactitol in Escherichia coli K-12: isolation and mapping. *J Bacteriol* **1975**, *124*, 26–38, doi:10.1128/jb.124.1.26-38.1975.
  6. Fiedler, W.; Rotering, H. Properties of Escherichia coli mutants lacking membrane-derived oligosaccharides. *J Biol Chem* **1988**, *263*, 14684–14689.
  7. Denger, K.; Weiss, M.; Felux, A.K.; Schneider, A.; Mayer, C.; Spitteller, D.; Huhn, T.; Cook, A.M.; Schleheck, D. Sulphoglycolysis in Escherichia coli K-12 closes a gap in the biogeochemical sulphur cycle. *Nature* **2014**, *507*, 114–117, doi:10.1038/nature12947.
  8. Makui, H.; Roig, E.; Cole, S.T.; Helmann, J.D.; Gros, P.; Cellier, M.F. Identification of the Escherichia coli K-12 Nrap orthologue (MntH) as a selective divalent metal ion transporter. *Mol Microbiol* **2000**, *35*, 1065–1078, doi:10.1046/j.1365-2958.2000.01774.x.
  9. Bossemeyer, D.; Borchard, A.; Dosch, D.C.; Helmer, G.C.; Epstein, W.; Booth, I.R.; Bakker, E.P. K<sup>+</sup>-transport protein TrkA of Escherichia coli is a peripheral membrane protein that requires other trk gene products for attachment to the cytoplasmic membrane. *J Biol Chem* **1989**, *264*, 16403–16410.
  10. Polissi, A.; De Laurentis, W.; Zangrossi, S.; Briani, F.; Longhi, V.; Pesole, G.; Dehò, G. Changes in Escherichia coli transcriptome during acclimatization at low temperature. *Res Microbiol* **2003**, *154*, 573–580, doi:10.1016/s0923-2508(03)00167-0.
  11. Thongsomboon, W.; Serra, D.O.; Possling, A.; Hadjineophytou, C.; Hengge, R.; Cegelski, L. Phosphoethanolamine cellulose: A naturally produced chemically modified cellulose. *Science* **2018**, *359*, 334–338, doi:10.1126/science.aao4096.
  12. Sherman, D.J.; Xie, R.; Taylor, R.J.; George, A.H.; Okuda, S.; Foster, P.J.; Needleman, D.J.; Kahne, D. Lipopolysaccharide is transported to the cell surface by a membrane-to-membrane protein bridge. *Science* **2018**, *359*, 798–801, doi:10.1126/science.aar1886.
  13. Kruse, T.; Bork-Jensen, J.; Gerdes, K. The morphogenetic MreBCD proteins of Escherichia coli form an essential membrane-bound complex. *Mol Microbiol* **2005**, *55*, 78–89, doi:10.1111/j.1365-2958.2004.04367.x.
  14. Korea, C.G.; Badouraly, R.; Prevost, M.C.; Ghigo, J.M.; Beloin, C. Escherichia coli K-12 possesses multiple cryptic but functional chaperone-usher fimbriae with distinct surface specificities. *Environ Microbiol* **2010**, *12*, 1957–1977, doi:10.1111/j.1462-2920.2010.02202.x.
  15. Cote, J.M.; Taylor, E.A. The Glycosyltransferases of LPS Core: A Review of Four Heptosyltransferase Enzymes in Context. *Int J Mol Sci* **2017**, *18*, doi:10.3390/ijms18112256.
  16. Hubbard, B.K.; Koch, M.; Palmer, D.R.; Babbitt, P.C.; Gerlt, J.A. Evolution of enzymatic activities in the enolase superfamily: characterization of the (D)-glucarate/galactarate catabolic pathway in Escherichia coli. *Biochemistry* **1998**, *37*, 14369–14375, doi:10.1021/bi981124f.
  17. Schleif, R. Regulation of the L-arabinose operon of Escherichia coli. *Trends Genet* **2000**, *16*, 559–565, doi:10.1016/s0168-9525(00)02153-3.
  18. Miller, C.G.; Schwartz, G. Peptidase-deficient mutants of Escherichia coli. *J Bacteriol* **1978**, *135*, 603–611, doi:10.1128/jb.135.2.603-611.1978.
  19. Gawel, D.; Hamilton, M.D.; Schaaper, R.M. A novel mutator of Escherichia coli carrying a defect in the dgt gene, encoding a dGTP triphosphohydrolase. *J Bacteriol* **2008**, *190*, 6931–6939, doi:10.1128/JB.00935-08.
  20. Ren, G.; Wang, Z.; Li, Y.; Hu, X.; Wang, X. Effects of Lipopolysaccharide Core Sugar Deficiency on Colanic Acid

- Biosynthesis in *Escherichia coli*. *J Bacteriol* **2016**, *198*, 1576–1584, doi:10.1128/JB.00094-16.
21. Ohtsu, I.; Wiriyanawudhiwong, N.; Morigasaki, S.; Nakatani, T.; Kadokura, H.; Takagi, H. The L-cysteine/L-cystine shuttle system provides reducing equivalents to the periplasm in *Escherichia coli*. *J Biol Chem* **2010**, *285*, 17479–17487, doi:10.1074/jbc.M109.081356.
  22. Elssner, T.; Hennig, L.; Frauendorf, H.; Haferburg, D.; Kleber, H.P. Isolation, identification, and synthesis of gamma-butyrobetainyl-CoA and crotonobetainyl-CoA, compounds involved in carnitine metabolism of *E. coli*. *Biochemistry* **2000**, *39*, 10761–10769, doi:10.1021/bi000776c.
  23. MacLean, M.J.; Ness, L.S.; Ferguson, G.P.; Booth, I.R. The role of glyoxalase I in the detoxification of methylglyoxal and in the activation of the KefB K<sup>+</sup> efflux system in *Escherichia coli*. *Mol Microbiol* **1998**, *27*, 563–571, doi:10.1046/j.1365-2958.1998.00701.x.
  24. Varghese, S.; Tang, Y.; Imlay, J.A. Contrasting sensitivities of *Escherichia coli* aconitases A and B to oxidation and iron depletion. *J Bacteriol* **2003**, *185*, 221–230, doi:10.1128/JB.185.1.221-230.2003.
  25. Lövgren, J.M.; Wikström, P.M. The rlmB gene is essential for formation of Gm2251 in 23S rRNA but not for ribosome maturation in *Escherichia coli*. *J Bacteriol* **2001**, *183*, 6957–6960, doi:10.1128/jb.183.23.6957-6960.2001.
  26. Rangarajan, E.S.; Li, Y.; Ajamian, E.; Iannuzzi, P.; Kernaghan, S.D.; Fraser, M.E.; Cygler, M.; Matte, A. Crystallographic trapping of the glutamyl-CoA thioester intermediate of family I CoA transferases. *J Biol Chem* **2005**, *280*, 42919–42928, doi:10.1074/jbc.M510522200.
  27. Sirko, A.; Zatyka, M.; Sadowy, E.; Hulanicka, D. Sulfate and thiosulfate transport in *Escherichia coli* K-12: evidence for a functional overlapping of sulfate- and thiosulfate-binding proteins. *J Bacteriol* **1995**, *177*, 4134–4136, doi:10.1128/jb.177.14.4134-4136.1995.
  28. McDowall, J.S.; Murphy, B.J.; Haumann, M.; Palmer, T.; Armstrong, F.A.; Sargent, F. Bacterial formate hydrogenlyase complex. *P Natl Acad Sci USA* **2014**, *111*, E3948–E3956, doi:10.1073/pnas.1407927111.
