# Supplementary material for: Adaptive Evolution Compensated for the Plasmid Fitness Costs Brought by Specific Genetic Conflicts
Source: Pathogens. 2023 Jan 13;12(1):137. doi: 10.3390/pathogens12010137 (PMC9861728; doi:10.3390/pathogens12010137)
Supplement: Supplementary file 1 [file pathogens-12-00137-s001.zip]

Archive with 4 entries (4 files):
- Table S1 SNPs found in chromosomes of E.coli strains carrying phn330.xlsx
- Table S2 SNPs found in chromosomes of the progeny strains of E. coli C600T .xlsx
- Table S3 Gene functional classification and clustering analyses with DAVID of nonsynonymous SNP-genes..xlsx
- Table S4-S6 Detailed functions of non-synonymous SNP-genes in Escherichia coli C600T, C600N500 and C600Y500.pdf
