# Supplementary material for: Adaptive Evolution Compensated for the Plasmid Fitness Costs Brought by Specific Genetic Conflicts
Source: Pathogens. 2023 Jan 13;12(1):137. doi: 10.3390/pathogens12010137 (PMC9861728; doi:10.3390/pathogens12010137)
Supplement: Supplementary file 1 [file pathogens-12-00137-s001.zip › Table S1 SNPs found in chromosomes of E.coli strains carrying phn330.xlsx]

## Sheet: Table S1
Table S1: SNPs found in chromosomes of E.coli strains carrying phn330.
CHROM	POS	TYPE	REF	ALT	EVIDENCE	FTYPE	STRAND	NT_POS	AA_POS	EFFECT	LOCUS_TAG	GENE	PRODUCT
E. coli C600/phn330 chromosome compared to phn330-free E.coli C600
FHGBBBMN_1	197291	snp	T	C	C:20 T:0	CDS	-	1313/1935	438/644	missense_variant c.1313A>G p.Glu438Gly	FHGBBBMN_00206		hypothetical protein
FHGBBBMN_3	226819	snp	C	A	A:20 C:0	CDS	-	874/2889	292/962	missense_variant c.874G>T p.Val292Phe	FHGBBBMN_00913	ptrA	Protease 3
FHGBBBMN_5	108091	snp	C	A	A:20 C:0	CDS	+	505/1425	169/474	missense_variant c.505C>A p.Leu169Met	FHGBBBMN_01231	lpdA	Dihydrolipoyl dehydrogenase
FHGBBBMN_5	179484	snp	G	T	T:20 G:0	CDS	+	1882/2433	628/810	missense_variant c.1882G>T p.Val628Phe	FHGBBBMN_01293	bamA	Outer membrane protein assembly factor BamA
FHGBBBMN_7	43746	snp	G	T	T:20 G:0	CDS	-	273/3894	91/1297	synonymous_variant c.273C>A p.Pro91Pro	FHGBBBMN_01560		hypothetical protein
FHGBBBMN_9	16136	snp	G	T	T:20 G:0	CDS	+	353/1356	118/451	missense_variant c.353G>T p.Gly118Val	FHGBBBMN_01862	melA	Alpha-galactosidase
FHGBBBMN_10	80532	snp	A	G	G:20 A:0
FHGBBBMN_10	80574	snp	T	G	G:20 T:0
FHGBBBMN_10	80606	snp	A	G	G:20 A:0
FHGBBBMN_12	35532	snp	T	G	G:20 T:0	CDS	+	48/549	16/182	synonymous_variant c.48T>G p.Thr16Thr	FHGBBBMN_02325	idi	Isopentenyl-diphosphate Delta-isomerase
FHGBBBMN_13	3566	snp	C	A	A:20 C:0	CDS	-	165/453	55/150	missense_variant c.165G>T p.Gln55His	FHGBBBMN_02418	gatA	PTS system galactitol-specific EIIA component
FHGBBBMN_14	57930	snp	A	C	C:20 A:0	CDS	+	222/2292	74/763	missense_variant c.222A>C p.Arg74Ser	FHGBBBMN_02576	mdoB	Phosphoglycerol transferase I
FHGBBBMN_25	56792	snp	G	T	T:10 G:0	CDS	-	66/249	22/82	synonymous_variant c.66C>A p.Thr22Thr	FHGBBBMN_03387		hypothetical protein
FHGBBBMN_27	33546	snp	A	C	C:20 A:0	CDS	+	338/897	113/298	missense_variant c.338A>C p.Gln113Pro	FHGBBBMN_03474	yihV	Sulfofructose kinase
FHGBBBMN_28	44129	snp	C	A	A:20 C:0	CDS	-	392/1239	131/412	missense_variant c.392G>T p.Gly131Val	FHGBBBMN_03538	mntH	Divalent metal cation transporter MntH
FHGBBBMN_31	33721	snp	C	A	A:20 C:0	CDS	-	37/1377	13/458	missense_variant c.37G>T p.Gly13Cys	FHGBBBMN_03665	trkA	Trk system potassium uptake protein TrkA
FHGBBBMN_41	20794	snp	G	T	T:20 G:0	CDS	+	658/891	220/296	missense_variant c.658G>T p.Ala220Ser	FHGBBBMN_03992		hypothetical protein
FHGBBBMN_66	274	snp	A	C	C:20 A:0	CDS	+	152/234	51/77	missense_variant c.152A>C p.Lys51Thr	FHGBBBMN_04261	ydfK	Cold shock protein YdfK
FHGBBBMN_66	1119	snp	A	T	T:20 A:0	CDS	+	447/591	149/196	synonymous_variant c.447A>T p.Pro149Pro	FHGBBBMN_04262		Tn3 family transposase ISYps3
FHGBBBMN_66	1148	snp	C	T	T:20 C:0	CDS	+	476/591	159/196	missense_variant c.476C>T p.Ala159Val	FHGBBBMN_04262		Tn3 family transposase ISYps3
FHGBBBMN_79	876	snp	C	A	A:14 C:0
FHGBBBMN_80	426	snp	G	C	C:13 G:0
FHGBBBMN_80	508	snp	G	T	T:30 G:0
FHGBBBMN_86	245	snp	G	A	A:21 G:0
FHGBBBMN_86	321	snp	C	A	A:19 C:0
FHGBBBMN_86	335	snp	T	C	C:17 T:0
FHGBBBMN_86	387	snp	C	T	T:13 C:0
FHGBBBMN_86	392	snp	A	G	G:13 A:0
FHGBBBMN_89	138	snp	A	G	G:13 A:0
E. coli J53/phn330 chromosome compared to phn330-free E.coli J53
PKFFAPDO_6	144179	snp	A	C	C:20 A:0
PKFFAPDO_7	178576	snp	A	G	G:14 A:0
PKFFAPDO_26	62377	snp	A	T	T:20 A:0	CDS	+	447/591	149/196	synonymous_variant c.447A>T p.Pro149Pro	PKFFAPDO_03530		Tn3 family transposase ISYps3
PKFFAPDO_26	62406	snp	C	T	T:20 C:0	CDS	+	476/591	159/196	missense_variant c.476C>T p.Ala159Val	PKFFAPDO_03530		Tn3 family transposase ISYps3
PKFFAPDO_81	209	snp	G	A	A:19 G:0	CDS	+	141/207	47/68	synonymous_variant c.141G>A p.Arg47Arg	PKFFAPDO_04377		hypothetical protein
PKFFAPDO_81	304	complex	CTTAAC	TTTAGT	TTTAGT:18 CTTAAC:0
PKFFAPDO_85	112	snp	G	T	T:10 G:0
PKFFAPDO_86	297	snp	C	T	T:13 C:0
