# Supplementary material for: Adaptive Evolution Compensated for the Plasmid Fitness Costs Brought by Specific Genetic Conflicts
Source: Pathogens. 2023 Jan 13;12(1):137. doi: 10.3390/pathogens12010137 (PMC9861728; doi:10.3390/pathogens12010137)
Supplement: Supplementary file 1 [file pathogens-12-00137-s001.zip › Table S2 SNPs found in chromosomes of the progeny strains of E. coli C600T .xlsx]

## Sheet: Table S2
Table S2 SNPs found in chromosomes of the progeny strains of E. coli C600T.
CHROM	POS	TYPE	REF	ALT	EVIDENCE	FTYPE	STRAND	NT_POS	AA_POS	EFFECT	LOCUS_TAG	GENE	PRODUCT
E. coli C600N500 chromosome compared to E.coli C600T
GCFHOADD_1	193033	snp	C	A	A:20 C:0	CDS	-	402/1041	134/346	synonymous_variant c.402G>T p.Leu134Leu	GCFHOADD_00188	ynjI	Inner membrane protein YnjI
GCFHOADD_2	244152	snp	G	T	T:20 G:0
GCFHOADD_3	32827	snp	G	T	T:20 G:0	CDS	+	72/564	24/187	missense_variant c.72G>T p.Leu24Phe	GCFHOADD_00723		hypothetical protein
GCFHOADD_3	46121	snp	C	A	A:20 C:0	CDS	-	1110/1332	370/443	synonymous_variant c.1110G>T p.Pro370Pro	GCFHOADD_00730	argA	Amino-acid acetyltransferase
GCFHOADD_3	77940	snp	C	A	A:20 C:0	CDS	+	854/1341	285/446	missense_variant c.854C>A p.Pro285Gln	GCFHOADD_00761	gudD	Glucarate dehydratase
GCFHOADD_4	34091	snp	C	A	A:20 C:0
GCFHOADD_5	50324	snp	C	A	A:20 C:0	CDS	+	263/879	88/292	missense_variant c.263C>A p.Ala88Asp	GCFHOADD_01181	araC	Arabinose operon regulatory protein
GCFHOADD_5	160086	snp	G	T	T:20 G:0	CDS	+	1175/1518	392/505	missense_variant c.1175G>T p.Ser392Ile	GCFHOADD_01275	dgt	Deoxyguanosinetriphosphate triphosphohydrolase
GCFHOADD_5	179484	snp	T	G	G:20 T:0	CDS	+	1882/2433	628/810	missense_variant c.1882T>G p.Phe628Val	GCFHOADD_01292	bamA	Outer membrane protein assembly factor BamA
GCFHOADD_7	30008	snp	C	A	A:20 C:0	CDS	+	39/1047	13/348	missense_variant c.39C>A p.Asp13Glu	GCFHOADD_01551	rfaF	ADP-heptose--LPS heptosyltransferase 2
GCFHOADD_8	12431	snp	G	T	T:20 G:0	CDS	-	248/1080	83/359	missense_variant c.248C>A p.Ala83Asp	GCFHOADD_01700	lptF	Lipopolysaccharide export system permease protein LptF
GCFHOADD_10	52846	snp	C	A	A:20 C:0	CDS	+	310/1041	104/346	missense_variant c.310C>A p.Leu104Ile	GCFHOADD_02054		hypothetical protein
GCFHOADD_11	89751	snp	C	A	A:20 C:0	CDS	-	600/978	200/325	synonymous_variant c.600G>T p.Gly200Gly	GCFHOADD_02236	thiL	Thiamine-monophosphate kinase
GCFHOADD_17	10849	snp	G	T	T:20 G:0	CDS	-	1187/1398	396/465	missense_variant c.1187C>A p.Pro396Gln	GCFHOADD_02833	ycjX	putative protein YcjX
GCFHOADD_18	31874	snp	C	A	A:20 C:0	CDS	+	887/1680	296/559	missense_variant c.887C>A p.Thr296Asn	GCFHOADD_02943	bcsG	Cellulose biosynthesis protein BcsG
GCFHOADD_21	3262	snp	A	C	C:20 A:0	CDS	-	854/1332	285/443	missense_variant c.854T>G p.Ile285Ser	GCFHOADD_03153	pepQ	Xaa-Pro dipeptidase
GCFHOADD_22	14205	snp	C	A	A:20 C:0	CDS	-	85/1221	29/406	stop_gained c.85G>T p.Gly29*	GCFHOADD_03232	mshA	D-inositol-3-phosphate glycosyltransferase
GCFHOADD_31	4680	snp	C	A	A:20 C:0	CDS	-	2506/2604	836/867	missense_variant c.2506G>T p.Ala836Ser	GCFHOADD_03674	sfmD	Outer membrane usher protein SfmD
GCFHOADD_35	6856	snp	C	A	A:20 C:0	CDS	-	272/1206	91/401	missense_variant c.272G>T p.Gly91Val	GCFHOADD_03822	paaJ	3-oxoadipyl-CoA/3-oxo-5,6-dehydrosuberyl-CoA thiolase
GCFHOADD_38	7585	snp	C	A	A:20 C:0	CDS	-	233/1104	78/367	missense_variant c.233G>T p.Arg78Leu	GCFHOADD_03913	mreC	Cell shape-determining protein MreC
GCFHOADD_70	680	snp	G	A	A:20 G:0	CDS	+	8/591	3/196	missense_variant c.8G>A p.Arg3Gln	GCFHOADD_04347		Tn3 family transposase ISYps3
GCFHOADD_70	975	snp	G	T	T:20 G:0	CDS	+	303/591	101/196	synonymous_variant c.303G>T p.Gly101Gly	GCFHOADD_04347		Tn3 family transposase ISYps3
GCFHOADD_70	1690	snp	T	C	C:20 T:0	CDS	-	247/576	83/191	missense_variant c.247A>G p.Asn83Asp	GCFHOADD_04348	tfaE_3	Prophage tail fiber assembly protein TfaE
GCFHOADD_74	1034	snp	G	A	A:11 G:0	CDS	-	415/567	139/188	stop_gained c.415C>T p.Gln139*	GCFHOADD_04352		hypothetical protein
GCFHOADD_83	570	snp	G	A	A:20 G:0
GCFHOADD_83	876	snp	A	C	C:14 A:0
GCFHOADD_95	355	snp	A	C	C:10 A:0
GCFHOADD_96	297	snp	C	T	T:13 C:0
E. coli C600Y500 chromosome compared to E.coli C600T
GCFHOADD_1	76556	snp	G	T	T:20 G:0	CDS	+	157/408	53/135	missense_variant c.157G>T p.Ala53Ser	GCFHOADD_00075	gloA	Lactoylglutathione lyase
GCFHOADD_1	124354	snp	A	G	G:20 A:0	CDS	+	205/1596	69/531	missense_variant c.205A>G p.Thr69Ala	GCFHOADD_00119	ydiF	Acetate CoA-transferase YdiF
GCFHOADD_1	174441	snp	C	A	A:20 C:0
GCFHOADD_1	347889	snp	G	T	T:20 G:0	CDS	-	341/858	114/285	stop_gained c.341C>A p.Ser114*	GCFHOADD_00343	fliY	L-cystine-binding protein FliY
GCFHOADD_3	803	snp	G	T	T:20 G:0	CDS	+	77/432	26/143	missense_variant c.77G>T p.Trp26Leu	GCFHOADD_00688		hypothetical protein
GCFHOADD_3	152067	snp	C	A	A:20 C:0	CDS	+	348/543	116/180	missense_variant c.348C>A p.Asn116Lys	GCFHOADD_00830	hycF	NAD(P)H-quinone oxidoreductase subunit I, chloroplastic
GCFHOADD_4	5854	snp	A	G	G:12 A:0
GCFHOADD_5	19239	snp	G	T	T:20 G:0	CDS	-	823/1143	275/380	missense_variant c.823C>A p.Arg275Ser	GCFHOADD_01156	caiA_2	Crotonobetainyl-CoA reductase
GCFHOADD_5	179484	snp	T	G	G:20 T:0	CDS	+	1882/2433	628/810	missense_variant c.1882T>G p.Phe628Val	GCFHOADD_01292	bamA	Outer membrane protein assembly factor BamA
GCFHOADD_7	38261	snp	C	A	A:20 C:0	CDS	-	918/1080	306/359	synonymous_variant c.918G>T p.Pro306Pro	GCFHOADD_01559	rfaB	Lipopolysaccharide 1,6-galactosyltransferase
GCFHOADD_8	89194	snp	G	T	T:20 G:0	CDS	-	449/732	150/243	missense_variant c.449C>A p.Pro150Gln	GCFHOADD_01776	rlmB	23S rRNA (guanosine-2'-O-)-methyltransferase RlmB
GCFHOADD_13	56735	snp	G	T	T:20 G:0	CDS	-	842/990	281/329	missense_variant c.842C>A p.Pro281Gln	GCFHOADD_02444	sbp	Sulfate-binding protein
GCFHOADD_17	58457	snp	C	A	A:20 C:0	CDS	-	1865/2676	622/891	missense_variant c.1865G>T p.Gly622Val	GCFHOADD_02878	acnA	Aconitate hydratase A
GCFHOADD_21	40585	snp	G	T	T:20 G:0	CDS	-	170/204	57/67	missense_variant c.170C>A p.Ala57Asp	GCFHOADD_03189		hypothetical protein
GCFHOADD_22	38086	snp	G	T	T:20 G:0	CDS	-	689/1854	230/617	missense_variant c.689C>A p.Ala230Asp	GCFHOADD_03252		hypothetical protein
GCFHOADD_25	54723	snp	G	T	T:21 G:0	CDS	+	926/1068	309/355	missense_variant c.926G>T p.Arg309Ile	GCFHOADD_03434	yghQ	Inner membrane protein YghQ
GCFHOADD_36	25473	snp	G	T	T:20 G:0	CDS	-	13/258	5/85	missense_variant c.13C>A p.Arg5Ser	GCFHOADD_03871		hypothetical protein
GCFHOADD_70	1119	snp	T	A	A:20 T:0	CDS	+	447/591	149/196	synonymous_variant c.447T>A p.Pro149Pro	GCFHOADD_04347		Tn3 family transposase ISYps3
GCFHOADD_70	1148	snp	T	C	C:20 T:0	CDS	+	476/591	159/196	missense_variant c.476T>C p.Val159Ala	GCFHOADD_04347		Tn3 family transposase ISYps3
GCFHOADD_74	1034	snp	G	A	A:11 G:0	CDS	-	415/567	139/188	stop_gained c.415C>T p.Gln139*	GCFHOADD_04352		hypothetical protein
GCFHOADD_83	876	snp	A	C	C:14 A:0
GCFHOADD_92	245	snp	A	G	G:21 A:0
GCFHOADD_92	321	snp	A	C	C:19 A:0
GCFHOADD_92	335	snp	C	T	T:17 C:0
GCFHOADD_92	387	snp	T	C	C:13 T:0
GCFHOADD_92	392	snp	G	A	A:13 G:0
GCFHOADD_95	355	snp	A	C	C:10 A:0
