# Supplementary material for: Adaptive Evolution Compensated for the Plasmid Fitness Costs Brought by Specific Genetic Conflicts
Source: Pathogens. 2023 Jan 13;12(1):137. doi: 10.3390/pathogens12010137 (PMC9861728; doi:10.3390/pathogens12010137)
Supplement: Supplementary file 1 [file pathogens-12-00137-s001.zip › Table S3 Gene functional classification and clustering analyses with DAVID of nonsynonymous SNP-genes..xlsx]

## Sheet: Table S3
Table S3 Gene functional classification and clustering analyses with DAVID of nonsynonymous SNP-genes.
Category	Term	Count	%	PValue	Genes	List	Total	Pop	Hits	Pop	Total	Fold
Gene functional classification and clustering analyses with DAVID of all nonsynonymous SNP-genes in the C600T strain
GOTERM_MF_DIRECT	GO:0005515~protein binding	5	50	0.27056	lpdA,trkA,mntH,bamA,melA	9	1119	3299	1.63787	0.999998	1	1
UP_KW_CELLULAR_COMPONENT	KW-0472~Membrane	5	50	0.497216	lpdA,trkA,mntH,bamA,mdoB	7	1214	2103	1.23735	0.983846	1	1
GOTERM_CC_DIRECT	GO:0016020~membrane	5	50	0.50554	lpdA,trkA,mntH,bamA,mdoB	9	1316	2974	1.25549	0.999786	1	1
UP_KW_CELLULAR_COMPONENT	KW-0997~Cell inner membrane	4	40	0.561151	lpdA,trkA,mntH,mdoB	7	949	2103	1.2663	0.992857	1	1
GOTERM_CC_DIRECT	GO:0005886~plasma membrane	4	40	0.663728	lpdA,trkA,mntH,mdoB	9	1160	2974	1.13946	0.999998	1	1
UP_KW_CELLULAR_COMPONENT	KW-1003~Cell membrane	4	40	0.691884	lpdA,trkA,mntH,mdoB	7	1092	2103	1.10047	0.999144	1	1
GOTERM_CC_DIRECT	GO:0016021~integral component of membrane	3	30	0.801764	mntH,bamA,mdoB	9	985	2974	1.00643	1	1	1
UP_KW_DOMAIN	KW-0812~Transmembrane	3	30	0.929167	mntH,bamA,mdoB	6	958	1540	0.803758	1	1	1
Gene functional classification and clustering analyses with DAVID of nonsynonymous SNP-genes in the C600N500 strain
UP_KW_DOMAIN	KW-0812~Transmembrane	5	38.4615	0.1494	lptF,bcsG,mreC,bamA,sfmD	5	958	1540	1.60752	0.621249	0.448199	0.448199
GOTERM_CC_DIRECT	GO:0016021~integral component of membrane	5	38.4615	0.169781	lptF,bcsG,mreC,bamA,sfmD	8	985	2974	1.88706	0.910977	1	1
UP_KW_CELLULAR_COMPONENT	KW-0472~Membrane	5	38.4615	0.298558	lptF,bcsG,mreC,bamA,sfmD	6	1214	2103	1.44357	0.830192	0.746396	0.746396
GOTERM_CC_DIRECT	GO:0016020~membrane	5	38.4615	0.37575	lptF,bcsG,mreC,bamA,sfmD	8	1316	2974	1.41242	0.997814	1	1
UP_SEQ_FEATURE	TOPO_DOM:Periplasmic	3	23.0769	0.572856	lptF,mreC,bamA	10	626	3085	1.47843	1	1	1
UP_KW_CELLULAR_COMPONENT	KW-0997~Cell inner membrane	3	23.0769	0.745951	lptF,bcsG,mreC,	6	949	2103	1.10801	0.998942	1	1
UP_SEQ_FEATURE	TRANSMEM:Helical	3	23.0769	0.763251	lptF,bcsG,mreC,	10	859	3085	1.07742	1	1	1
UP_KW_DOMAIN	KW-1133~Transmembrane helix	3	23.0769	0.812006	lptF,bcsG,mreC,	5	912	1540	1.01316	0.999956	1	1
GOTERM_CC_DIRECT	GO:0005886~plasma membrane	3	23.0769	0.828299	lptF,bcsG,mreC,	8	1160	2974	0.961422	1	1	1
UP_KW_CELLULAR_COMPONENT	KW-1003~Cell membrane	3	23.0769	0.835942	lptF,bcsG,mreC,	6	1092	2103	0.962912	0.999881	1	1
Gene functional classification and clustering analyses with DAVID of nonsynonymous SNP-genes in the C600Y500 strain
UP_KW_DOMAIN	KW-0732~Signal	3	33.3333	0.229895	fliY,sbp,bamA	4	479	1540	2.41127	0.729136	1	1
GOTERM_CC_DIRECT	GO:0005737~cytoplasm	4	44.4444	0.327216	caiA,gloA,acnA,rlmB	8	859	2976	1.73225	0.981	1	1
KEGG_PATHWAY	eco01100:Metabolic pathways	3	33.3333	0.734871	gloA,acnA,ydiF	5	917	1722	1.12672	1	1	1
GOTERM_MF_DIRECT	GO:0005515~protein binding	3	33.3333	0.747025	gloA,bamA,rlmB	8	1118	3299	1.10655	1	1	1
GOTERM_CC_DIRECT	GO:0005829~cytosol	3	33.3333	0.771864	gloA,acnA,rlmB	8	1051	2976	1.06185	1	1	1
GOTERM_CC_DIRECT	GO:0016020~membrane	3	33.3333	0.889231	fliY,bamA,yghQ	8	1313	2976	0.849962	1	1	1
